# Supplementary material
Source: PubMed Central journal article supplement (PMC6366606)

## Supporting Information

### Linear and Differential Ion Mobility Separations of Middle-Down Proteoforms

Alyssa Garabedian,<sup>†</sup> Matthew Baird,<sup>¶</sup> Jacob Porter,<sup>†</sup> Kevin Jeanne Dit Fouque,<sup>†</sup> Pavel V. Shliaha,<sup>‡</sup>  
Ole N. Jensen,<sup>‡</sup> Todd D. Williams,<sup>§</sup> Francisco Fernandez-Lima,<sup>†</sup> Alexandre Shvartsburg<sup>¶,\*</sup>

<sup>†</sup> Department of Chemistry and Biochemistry, Florida International University, Miami, FL 33199

<sup>¶</sup> Department of Chemistry, Wichita State University, 1845 Fairmount, Wichita, KS 67260

<sup>‡</sup> Department of Biochemistry and Molecular Biology, VILLUM Center for Bioanalytical Sciences, University of Southern Denmark, DK-5230 Odense M, Denmark

<sup>§</sup> Mass Spectrometry Laboratory, University of Kansas, Lawrence, KS 66045

\* alexandre.shvartsburg@wichita.edu

### Contents

Details of nESI/TIMS hardware and mobility calibration

Table S1. Table of features distinguished in TIMS spectra for all variants (from MeOH solution,  $t_{\text{ramp}} = 500$  ms): cross sections and measured resolving power values.

Figure S1. Relative (approximate) cross sections for K9ac (dominant peaks). Lines guide the eye through trends below and above the transition region.

Figure S2. TWIMS spectra for selected mixtures of me3, p, and me variants measured in N<sub>2</sub> using solvent (i) (solid black lines) with fits by scaled individual traces from Fig. 1 (colored lines) and their computed additions (dotted lines).

Figure S3. TWIMS spectra for selected variant mixtures measured in N<sub>2</sub> with solvent (i) using the traveling wave speeds of 650, 1000, and 1900 m/s.

Figure S4. Pairwise linear correlations between transit times for ac and me<sub>3</sub> variants at the traveling wave speeds of 650 and 1000 m/s. Variants with only three data points and p variants with partial data at  $s = 1000$  m/s are not included.

Figure S5. TWIMS spectra measured with different ESI solvents: (a) four me<sub>3</sub> variants ( $z = 9$ ) with solvents (i, ii, iii), (b) K23me<sub>3</sub> ( $z = 8$  and 9) with solvents (i, iv).

Figure S6. TWIMS spectra for four me<sub>3</sub> variants in  $z = 12$  measured in N<sub>2</sub> using solvent (ii) and  $s = 650$  m/s. No signal at 12+ was found for the K4me<sub>3</sub> variant.

Figure S7. TIMS spectra (on the cross section scale) measured for exemplary me<sub>3</sub>, ac, p, and me variant species using (a)  $t_{\text{ramp}} = 100 - 500$  ms from MeOH/H<sub>2</sub>O solutions, (b) from MeOH/H<sub>2</sub>O and aqueous solutions.

Figure S8. TIMS spectra for selected mixtures of p variants and traces for the two components.

Figure S9. Linear correlations between transit times for me<sub>3</sub>, ac, and p variants across charge state pairs (major peaks from Fig. 1). Variants for me (with three data points) are not included.

Figure S10. Linear correlations between separation parameters in TIMS for the acetylated and phosphorylated peptide variants in different charge states.

Figure S11. Linear correlations between separation parameters in Synapt and TIMS for the

acetylated and phosphorylated peptide variants.

Figure S12. Linear correlations between FAIMS and TIMS (left column) or TWIMS (right column) separations for (a) acetylated and (b) phosphorylated variants,  $r^2$  marked. To facilitate comparison, the left column in (a) repeats the data from Fig. 6 in the text.

Figure S13. Linear correlations between FAIMS and TIMS (left) or TWIMS (right) separations for same acetylated (a) and phosphorylated (b) variants with different charge states selected in the two dimensions ( $r^2$  marked).

## Details of nESI/TIMS hardware and mobility calibration

### Nano-ESI source

Custom nESI emitters were made from quartz glass capillaries (I.D. 0.7 mm, O.D. 1.0 mm) utilizing a P-2000 micropipette laser puller (Sutter Instruments, Novato, CA). The inlet capillary was a stainless steel tube ( $1/16 \times 0.020''$ , IDEX Health Science, Oak Harbor, WA).

### TIMS cell

The TIMS cell is an electrodynamic ion funnel with three regions (see scheme below): entrance, analyzer tunnel (46 mm length), and exit. The rf voltage creates a quadrupolar field in the tunnel and dipolar field in other regions.

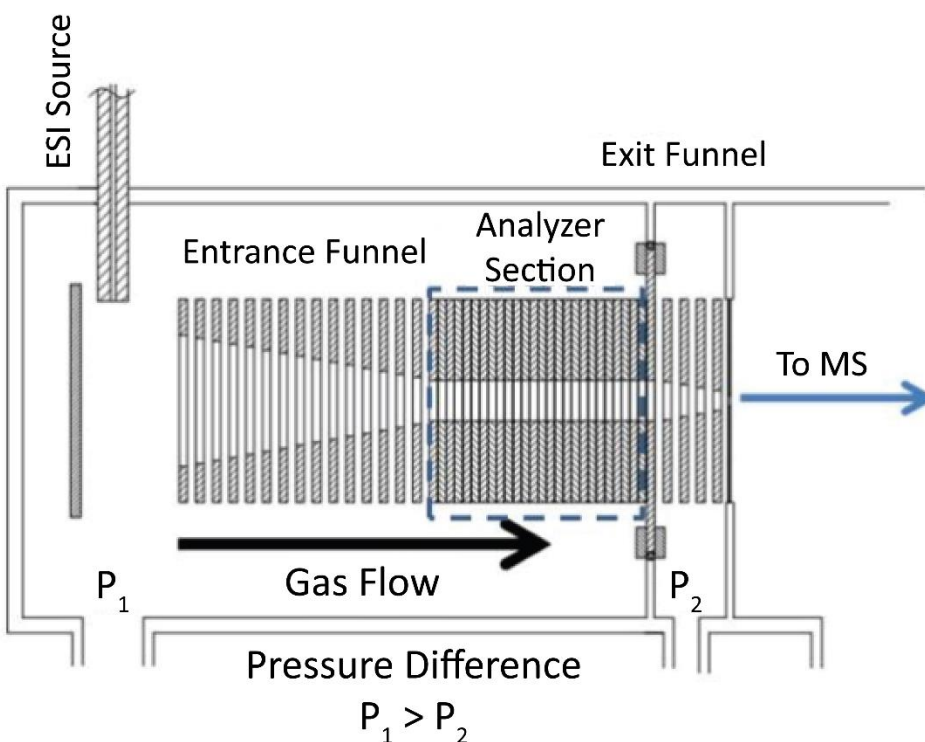

### Mobility calibration in TIMS

Multiple ion species are first trapped and thermalized at different  $E$  values set up by voltage profile along the tunnel, then pushed out by “ramping” (decreasing)  $E$  in steps with each species eluting at a characteristic voltage ( $V_{\text{elution}} - V_{\text{out}}$ ). The total time an ion spends in the system (from gating into the TIMS cell to registration at the ToF detector) is:

$$t_{\text{total}} = t_{\text{trap}} + (V_{\text{elution}}/V_{\text{ramp}}) \times t_{\text{ramp}} + t_{\text{ToF}} = t_0 + (V_{\text{elution}}/V_{\text{ramp}}) \times t_{\text{ramp}},$$

where  $t_{\text{trap}}$  is the trapping time,  $t_{\text{ToF}}$  is the flight time from cell exit to detector (through MS vacuum),  $V_{\text{ramp}}$  and  $t_{\text{ramp}}$  are the voltage range and time of ramp, and  $t_0$  is the constant time before and after the separation step. The  $V_{\text{elution}}$  and  $t_0$  values for each  $m/z$  of interest are determined simultaneously by varying  $t_{\text{ramp}}$  from 100 to 500 ms at fixed  $V_{\text{ramp}}$ . More details on this procedure are found in Ref. [50].

**Table S1.**

Collision cross sections (CCS, Å<sup>2</sup>) and resolving power (*R*) values for protonated histone tails measured using TIMS.

| Peptide | Ion                    | CCS (Å <sup>2</sup> ), std. error of mean: ± 0.04% | <i>R</i>                    |
|---------|------------------------|----------------------------------------------------|-----------------------------|
| K9me3   | [M+6H] <sup>6+</sup>   | 1303                                               | 137                         |
|         | [M+7H] <sup>7+</sup>   | 1398/1406                                          | 203/180                     |
|         | [M+8H] <sup>8+</sup>   | 1574/1607                                          | 96/102                      |
|         | [M+9H] <sup>9+</sup>   | 1685/1710/1735/1749                                | 153/119/141/211             |
|         | [M+10H] <sup>10+</sup> | 1835                                               | 170                         |
|         | [M+11H] <sup>11+</sup> | 1921                                               | 201                         |
| K23me3  | [M+6H] <sup>6+</sup>   | 1308                                               | 92                          |
|         | [M+7H] <sup>7+</sup>   | 1405/1437                                          | 82/72                       |
|         | [M+8H] <sup>8+</sup>   | 1508/1535/1574/1609                                | 188/284/146/223             |
|         | [M+9H] <sup>9+</sup>   | 1684/1707/1751                                     | 167/76/233                  |
|         | [M+10H] <sup>10+</sup> | 1830/1839                                          | 218/236                     |
|         | [M+11H] <sup>11+</sup> | 1926/1943                                          | 244/183                     |
| K36me3  | [M+6H] <sup>6+</sup>   | 1291/1357                                          | 128/137                     |
|         | [M+7H] <sup>7+</sup>   | 1394/1422/1441                                     | 59/133/119                  |
|         | [M+8H] <sup>8+</sup>   | 1483/1510                                          | 215/265                     |
|         | [M+9H] <sup>9+</sup>   | 1658/1702                                          | 240/122                     |
|         | [M+10H] <sup>10+</sup> | 1833                                               | 176                         |
|         | [M+11H] <sup>11+</sup> | 1948                                               | 229                         |
| K9ac    | [M+6H] <sup>6+</sup>   | 1209                                               | 105                         |
|         | [M+7H] <sup>7+</sup>   | 1290                                               | 145                         |
|         | [M+8H] <sup>8+</sup>   | 1395/1404/1420/1435/1447/1473                      | 199/187/202/144/90/184      |
|         | [M+9H] <sup>9+</sup>   | 1529/1563/1572/1603                                | 191/223/197/255             |
|         | [M+10H] <sup>10+</sup> | 1673/1694/1715                                     | 222/121/159                 |
|         | [M+11H] <sup>11+</sup> | 1784                                               | 133                         |
| K14ac   | [M+6H] <sup>6+</sup>   | 1205                                               | 120                         |
|         | [M+7H] <sup>7+</sup>   | 1298/1322                                          | 137/85                      |
|         | [M+8H] <sup>8+</sup>   | 1404/1411/1427/1434/1442/1451                      | 134/168/153/163/170/45      |
|         | [M+9H] <sup>9+</sup>   | 1541/1562/1572/1587/1625/1640                      | 220/112/210/122/216/262     |
|         | [M+10H] <sup>10+</sup> | 1701                                               | 150                         |
|         | [M+11H] <sup>11+</sup> | 1785/1814                                          | 223/151                     |
| K18ac   | [M+6H] <sup>6+</sup>   | 1207                                               | 72                          |
|         | [M+7H] <sup>7+</sup>   | 1287/1310                                          | 239/218                     |
|         | [M+8H] <sup>8+</sup>   | 1396/1405/1418/1428/1435/1454/1480                 | 208/156/153/111/197/117/159 |
|         | [M+9H] <sup>9+</sup>   | 1531/1563/1579/1611                                | 247/223/198/201             |
|         | [M+10H] <sup>10+</sup> | 1694                                               | 179                         |
|         | [M+11H] <sup>11+</sup> | 1786                                               | 192                         |
| K27ac   | [M+6H] <sup>6+</sup>   | 1210                                               | 145                         |
|         | [M+7H] <sup>7+</sup>   | 1294/1304/1326                                     | 223/215/221                 |

|       |                        |                                         |                                 |
|-------|------------------------|-----------------------------------------|---------------------------------|
|       | [M+8H] <sup>8+</sup>   | 1412/1420/1438/1452/1459/1484/1498      | 157/144/150/190/131/206/156     |
|       | [M+9H] <sup>9+</sup>   | 1558/1572/1616                          | 180/194/171                     |
|       | [M+10H] <sup>10+</sup> | 1695                                    | 131                             |
|       | [M+11H] <sup>11+</sup> | 1789                                    | 145                             |
|       | [M+6H] <sup>6+</sup>   | 1217                                    | 124                             |
|       | [M+7H] <sup>7+</sup>   | 1294/1301/1315                          | 193/239/198                     |
| K36ac | [M+8H] <sup>8+</sup>   | 1373/1396/1406/1425/1444/1456/1475      | 177/47/201/88/79/209/88         |
|       | [M+9H] <sup>9+</sup>   | 1526/1555/1575/1605/1621                | 209/216/108/189/80              |
|       | [M+10H] <sup>10+</sup> | 1683                                    | 155                             |
|       | [M+11H] <sup>11+</sup> | 1770/1792                               | 197/201                         |
|       | [M+6H] <sup>6+</sup>   | 1305                                    | 161                             |
|       | [M+7H] <sup>7+</sup>   | 1386/1412                               | 75/150                          |
| T3p   | [M+8H] <sup>8+</sup>   | 1556/1571/1596                          | 134/118/114                     |
|       | [M+9H] <sup>9+</sup>   | 1653/1691/1734                          | 221/72/73                       |
|       | [M+10H] <sup>10+</sup> | 1786                                    | 194                             |
|       | [M+11H] <sup>11+</sup> | 1878                                    | 146                             |
|       | [M+6H] <sup>6+</sup>   | 1319                                    | 134                             |
|       | [M+7H] <sup>7+</sup>   | 1412                                    | 159                             |
| T6p   | [M+8H] <sup>8+</sup>   | 1500/1523/1532/1568/1581/1612           | 70/206/174/204/144/269          |
|       | [M+9H] <sup>9+</sup>   | 1669/1714/1749                          | 121/163/192                     |
|       | [M+10H] <sup>10+</sup> | 1805                                    | 160                             |
|       | [M+11H] <sup>11+</sup> | 1921                                    | 209                             |
|       | [M+6H] <sup>6+</sup>   | 1300                                    | 122                             |
|       | [M+7H] <sup>7+</sup>   | 1401/1414/1425                          | 246/267/285                     |
| S10p  | [M+8H] <sup>8+</sup>   | 1511/1520/1534/1553/1565/1582/1593/1611 | 232/179/197/219/142/115/306/298 |
|       | [M+9H] <sup>9+</sup>   | 1665/1706/1736/1753/1767                | 86/74/235/428/89                |
|       | [M+10H] <sup>10+</sup> | 1783/1800/1852                          | 244/243/197                     |
|       | [M+11H] <sup>11+</sup> | 1917                                    | 167                             |
|       | [M+6H] <sup>6+</sup>   | 1307/1327                               | 82/140                          |
|       | [M+7H] <sup>7+</sup>   | 1380/1396/1423                          | 88/170/169                      |
| S28p  | [M+8H] <sup>8+</sup>   | 1515/1554/1579                          | 205/187/106                     |
|       | [M+9H] <sup>9+</sup>   | 1695/1726                               | 138/149                         |
|       | [M+10H] <sup>10+</sup> | 1829                                    | 116                             |
|       | [M+11H] <sup>11+</sup> | 1924                                    | 163                             |
|       | [M+6H] <sup>6+</sup>   | 1270                                    | 155                             |
|       | [M+7H] <sup>7+</sup>   | 1362/1379                               | 91/136                          |
| Y41p  | [M+8H] <sup>8+</sup>   | 1464/1499/1529/1553                     | 229/259/118/174                 |
|       | [M+9H] <sup>9+</sup>   | 1627/1691/1659/1744                     | 258/148/210/208                 |
|       | [M+10H] <sup>10+</sup> | 1824                                    | 182                             |
|       | [M+11H] <sup>11+</sup> | 1922/1869                               | 180/228                         |
|       | [M+6H] <sup>6+</sup>   | 1218                                    | 129                             |
| K4me  | [M+7H] <sup>7+</sup>   | 1303/1315/1326                          | 200/146/199                     |
|       | [M+8H] <sup>8+</sup>   | 1414/1428/1439/1452/1465/1493/1506/1517 | 89/291/175/278/144/138/232/124  |

|       |                        |                                    |                             |
|-------|------------------------|------------------------------------|-----------------------------|
|       | [M+9H] <sup>9+</sup>   | 1627/1638/1651                     | 148/252/229                 |
|       | [M+10H] <sup>10+</sup> | 1695/1730/1750                     | 213/122/221                 |
|       | [M+11H] <sup>11+</sup> | 1791/1799                          | 167/189                     |
|       | [M+6H] <sup>6+</sup>   | 1212                               | 135                         |
|       | [M+7H] <sup>7+</sup>   | 1301/1324                          | 190/221                     |
| K9me  | [M+8H] <sup>8+</sup>   | 1426/1438/1473/1499/1511           | 247/173/142/180/140         |
|       | [M+9H] <sup>9+</sup>   | 1574/1591/1628/1640                | 237/175/119/149             |
|       | [M+10H] <sup>10+</sup> | 1704                               | 97                          |
|       | [M+11H] <sup>11+</sup> | 1787                               | 167                         |
|       | [M+6H] <sup>6+</sup>   | 1218                               | 151                         |
|       | [M+7H] <sup>7+</sup>   | 1302/1309/1326/1336                | 193/73/165/69               |
| K23me | [M+8H] <sup>8+</sup>   | 1416/1430/1439/1453/1468/1494/1507 | 153/164/212/153/120/199/260 |
|       | [M+9H] <sup>9+</sup>   | 1561/1576/1625/1635                | 244/146/140/178             |
|       | [M+10H] <sup>10+</sup> | 1700                               | 90                          |
|       | [M+11H] <sup>11+</sup> | 1800                               | 143                         |

---



Figure S1

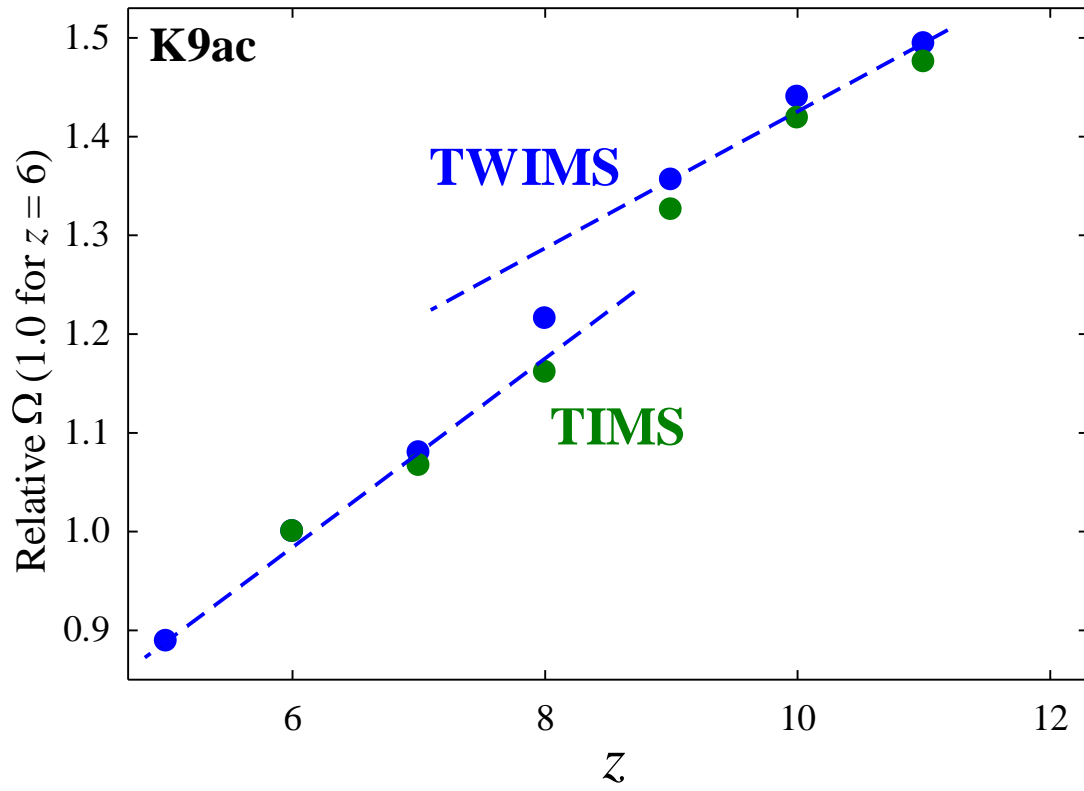

**Figure S2**

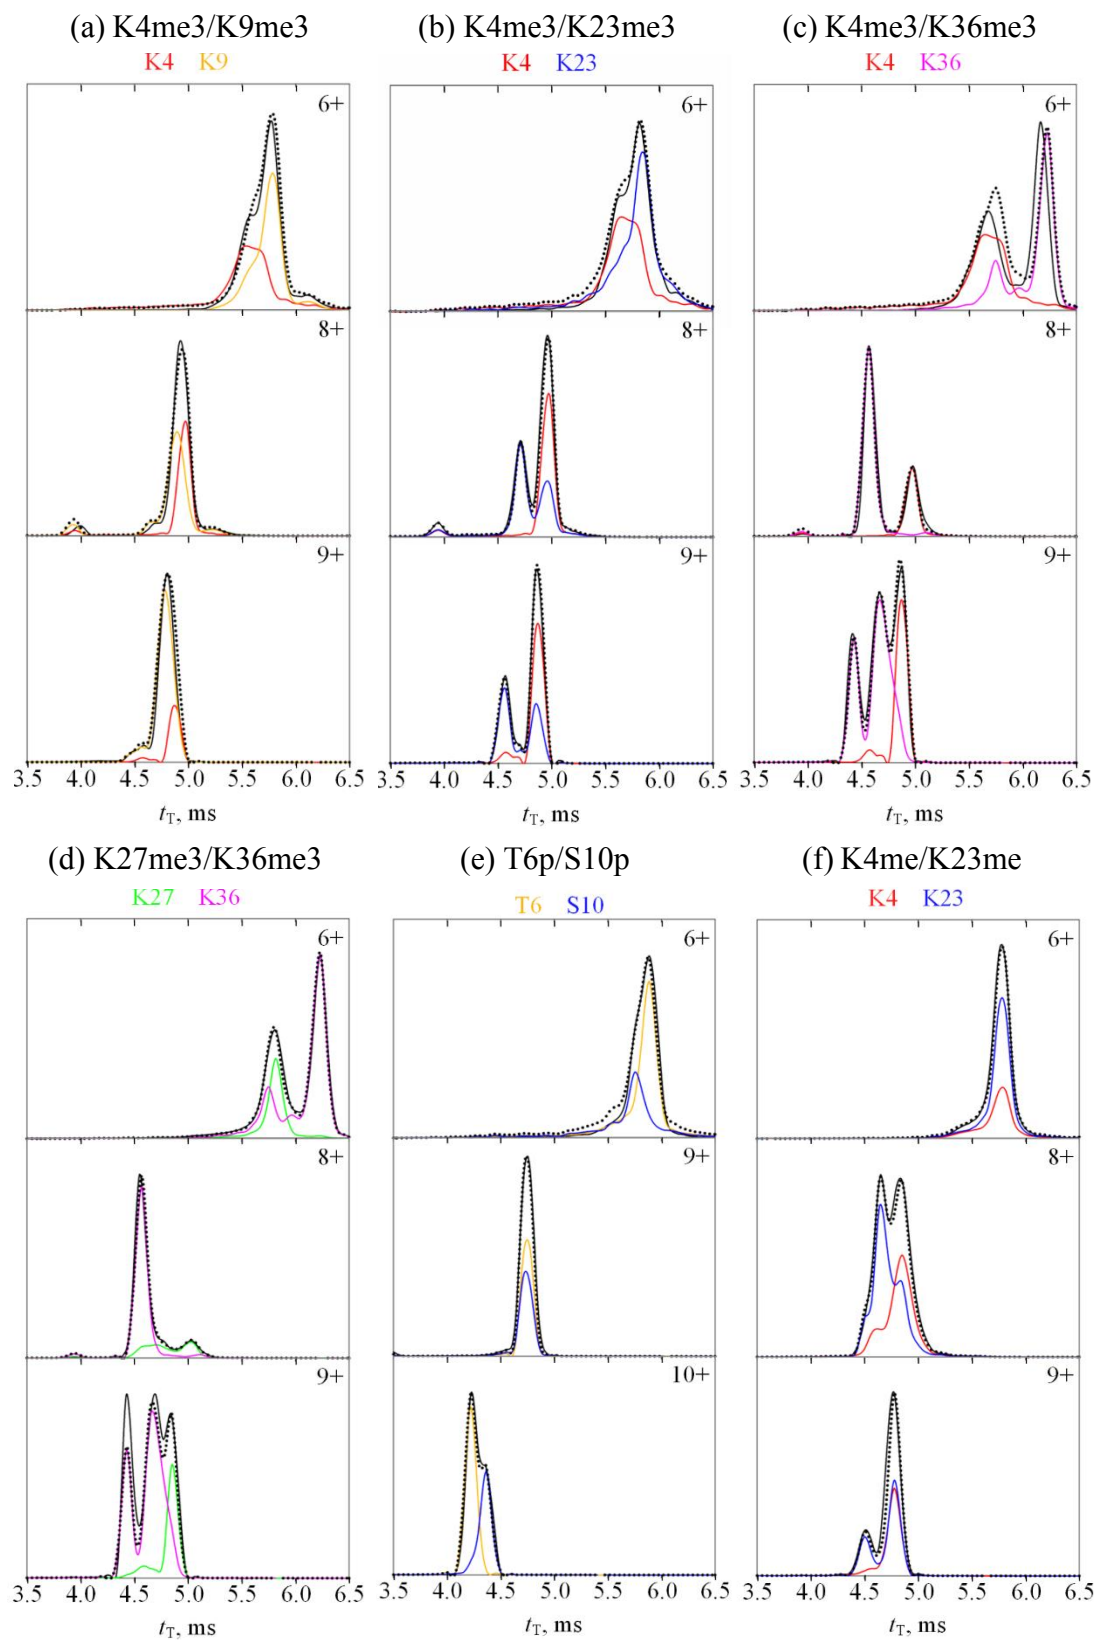

Figure S3

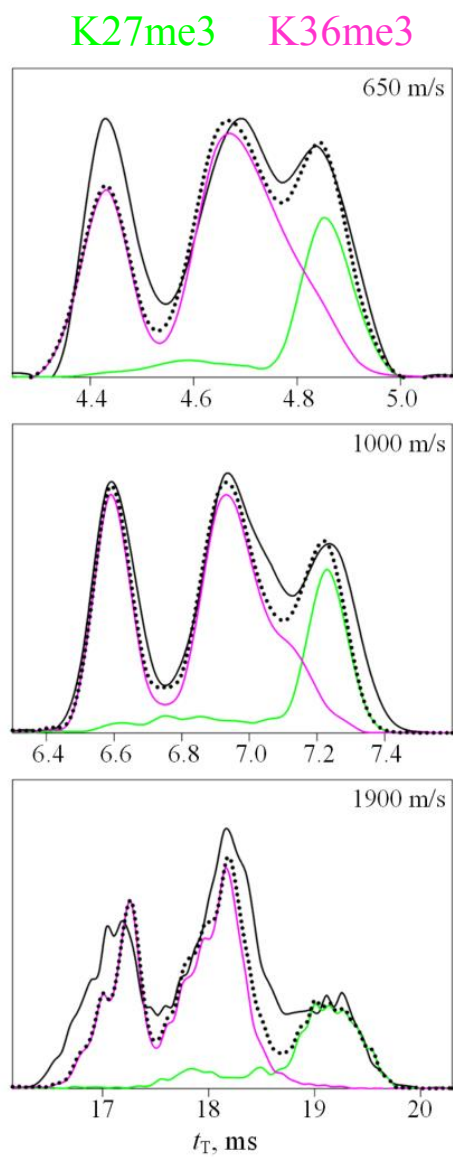

**Figure S3 (continued)**

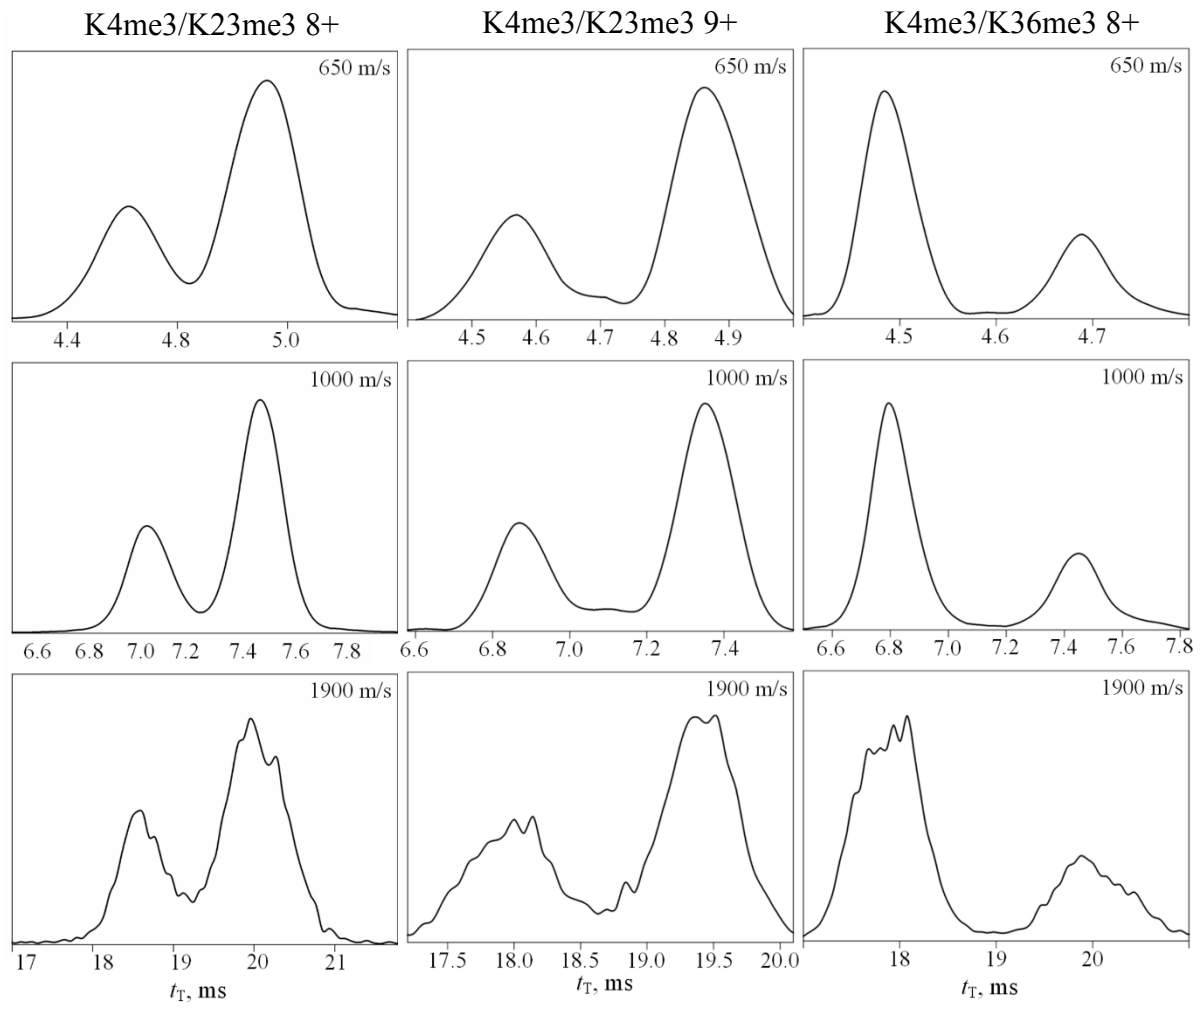

**Figure S3 (continued)**

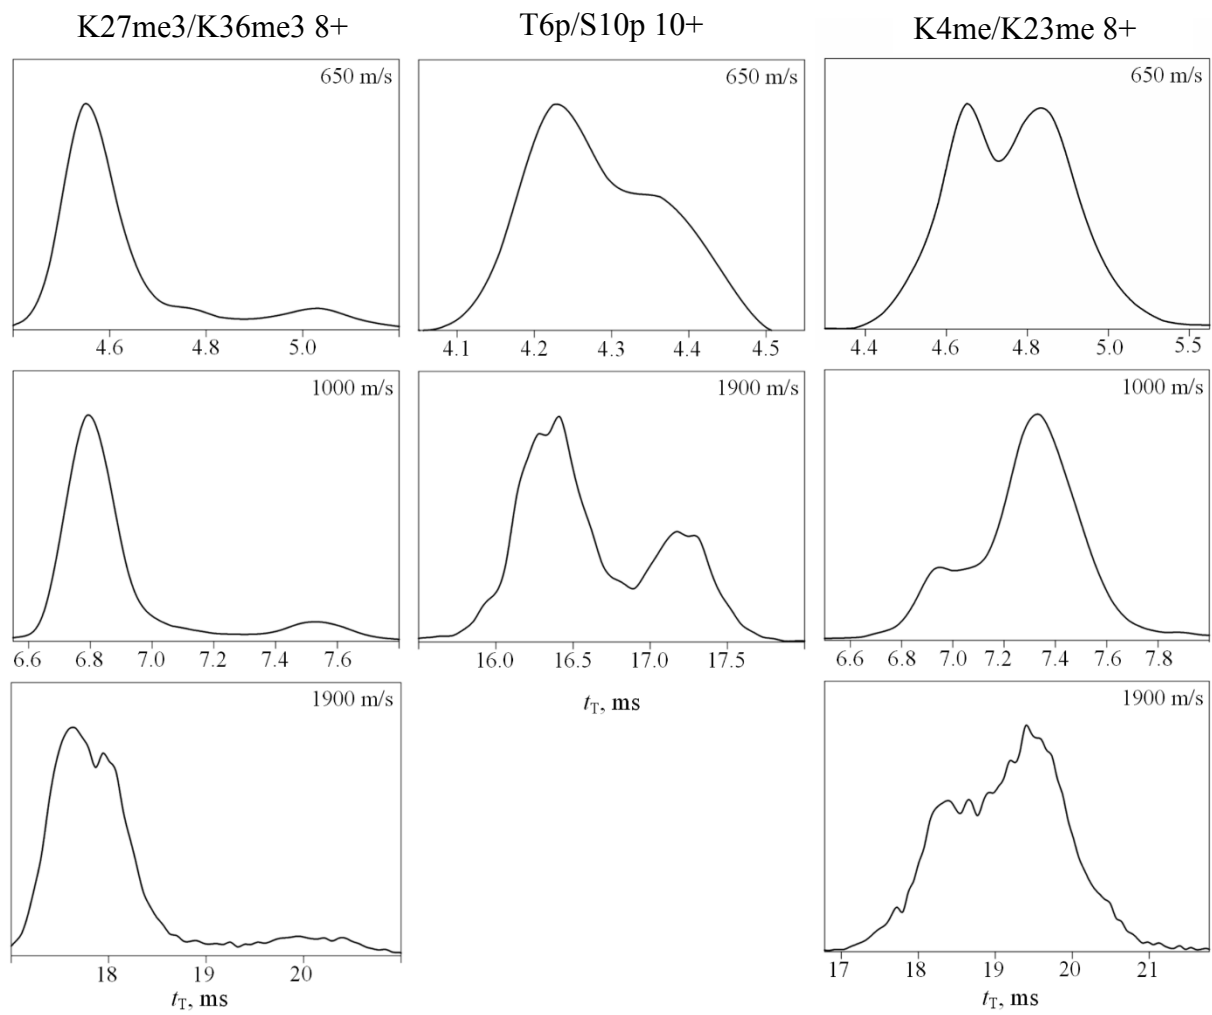

Figure S4

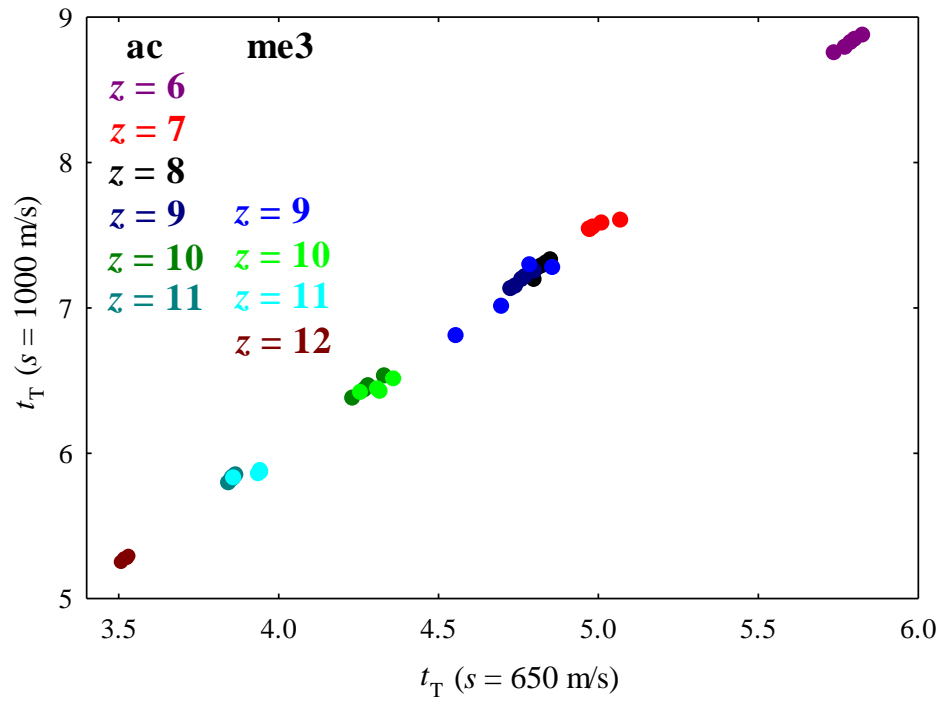

Figure S5

(a)

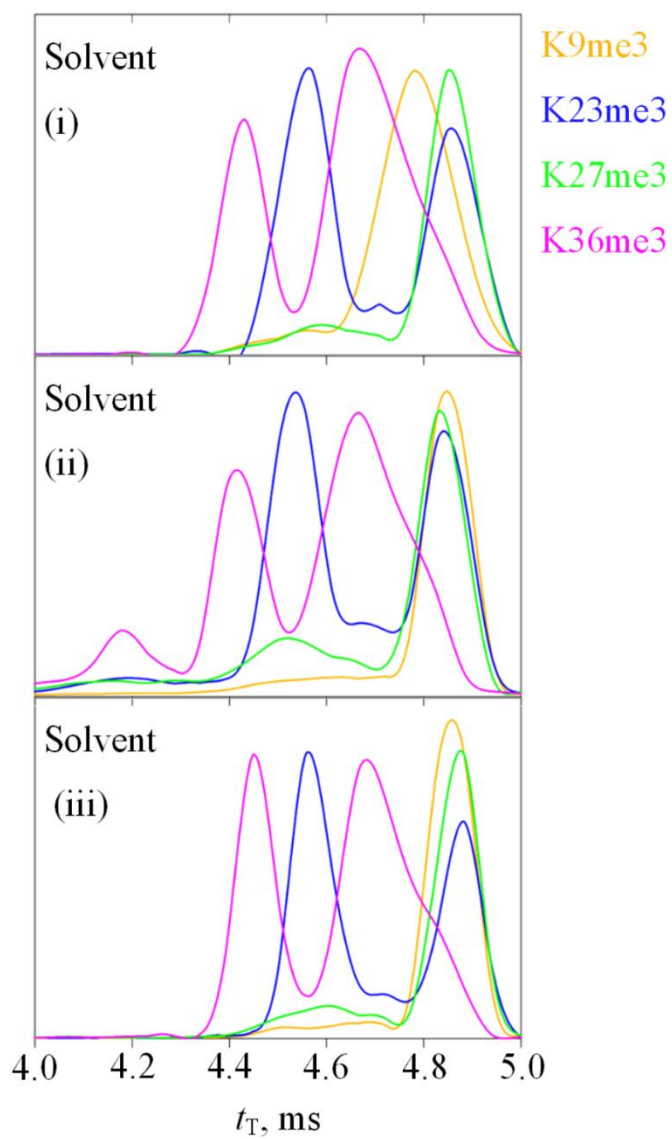

(b)

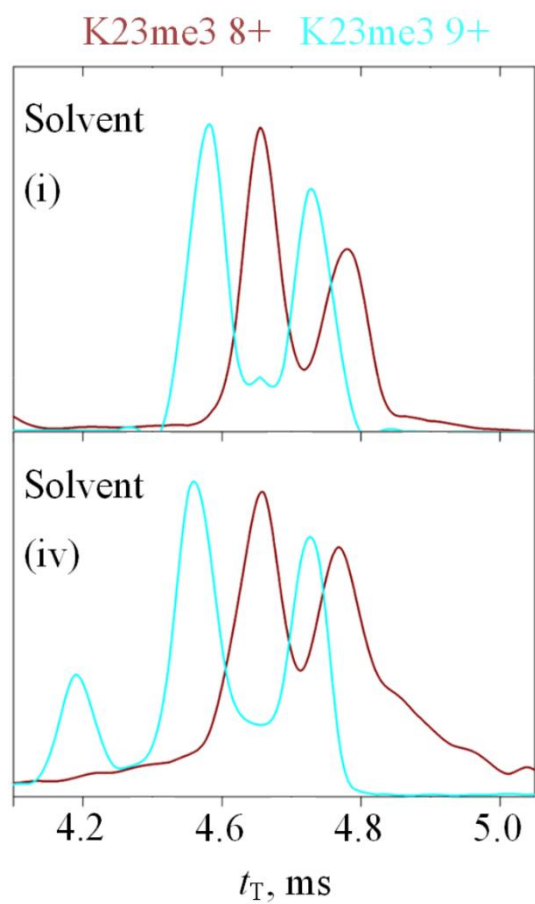

Figure S6

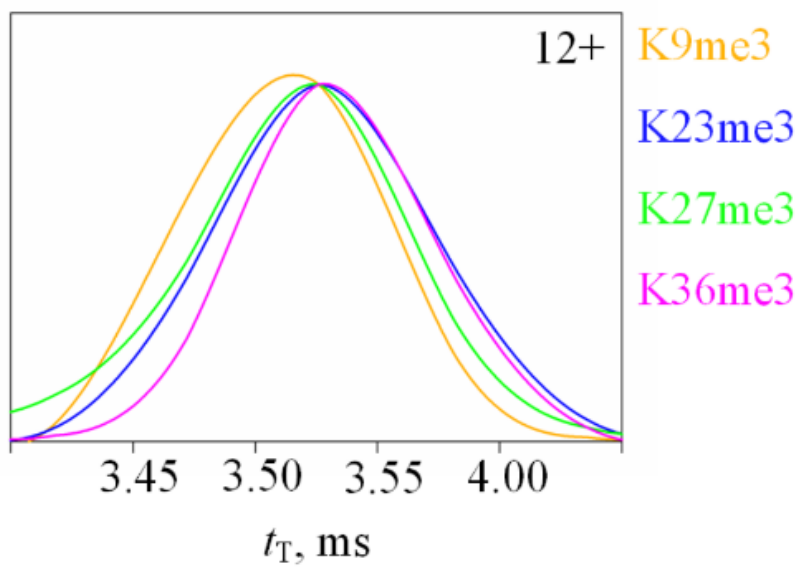



**Figure S7**

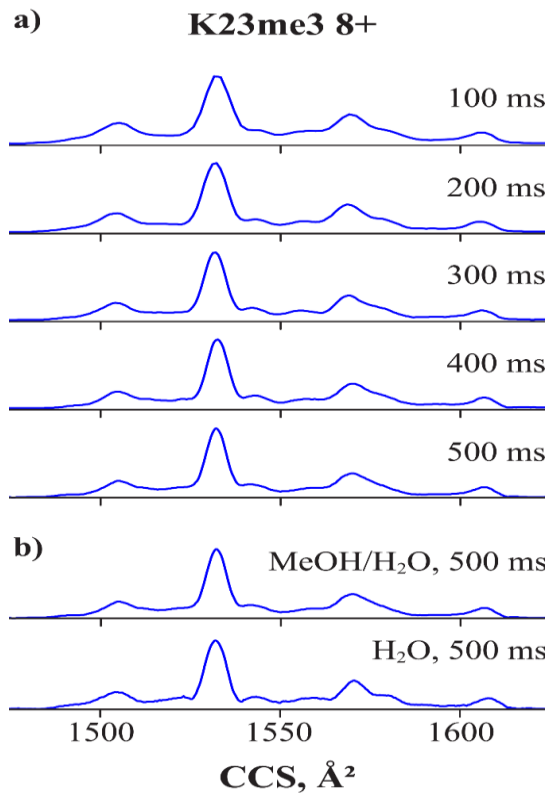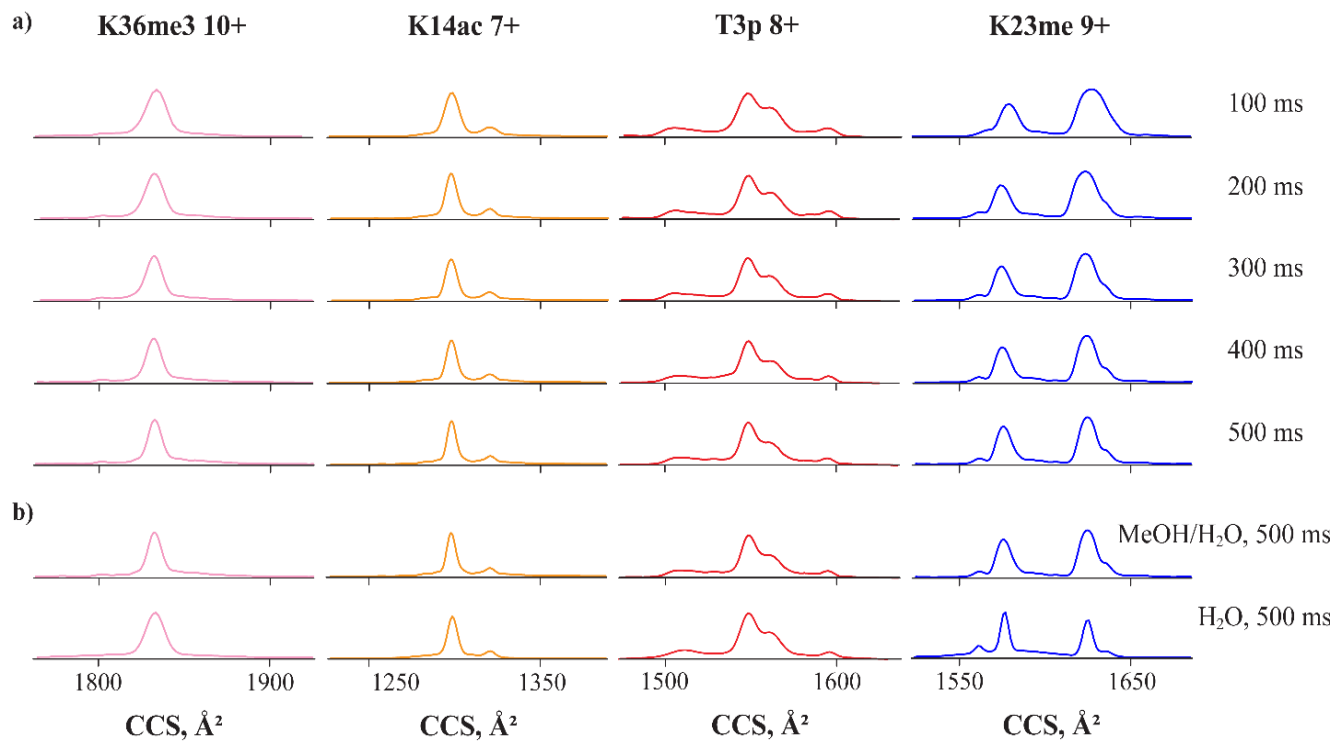

**Figure S8**

**Phosphorylated variants, 10+**

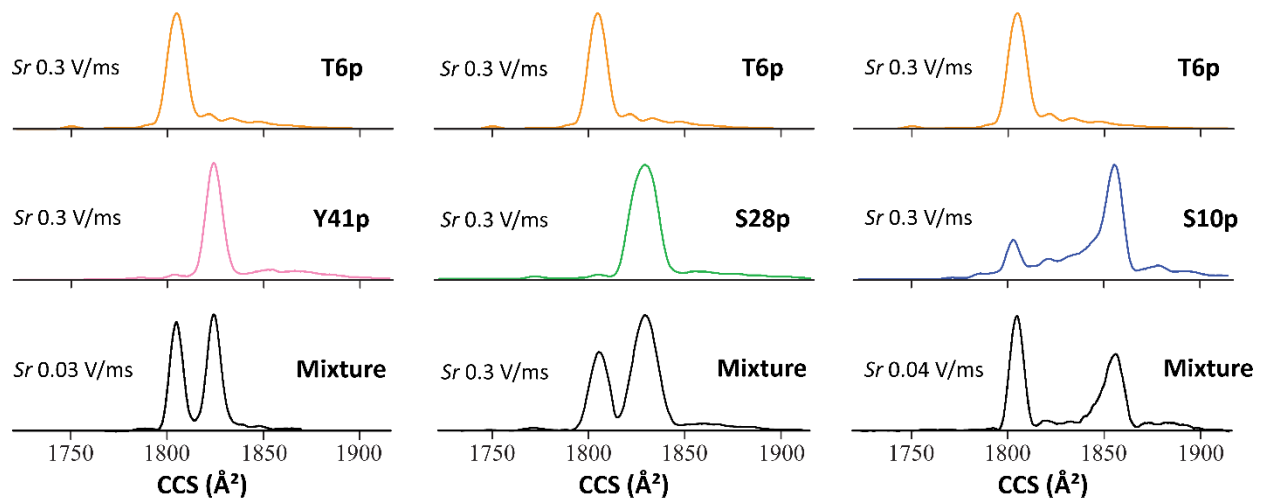

Figure S9

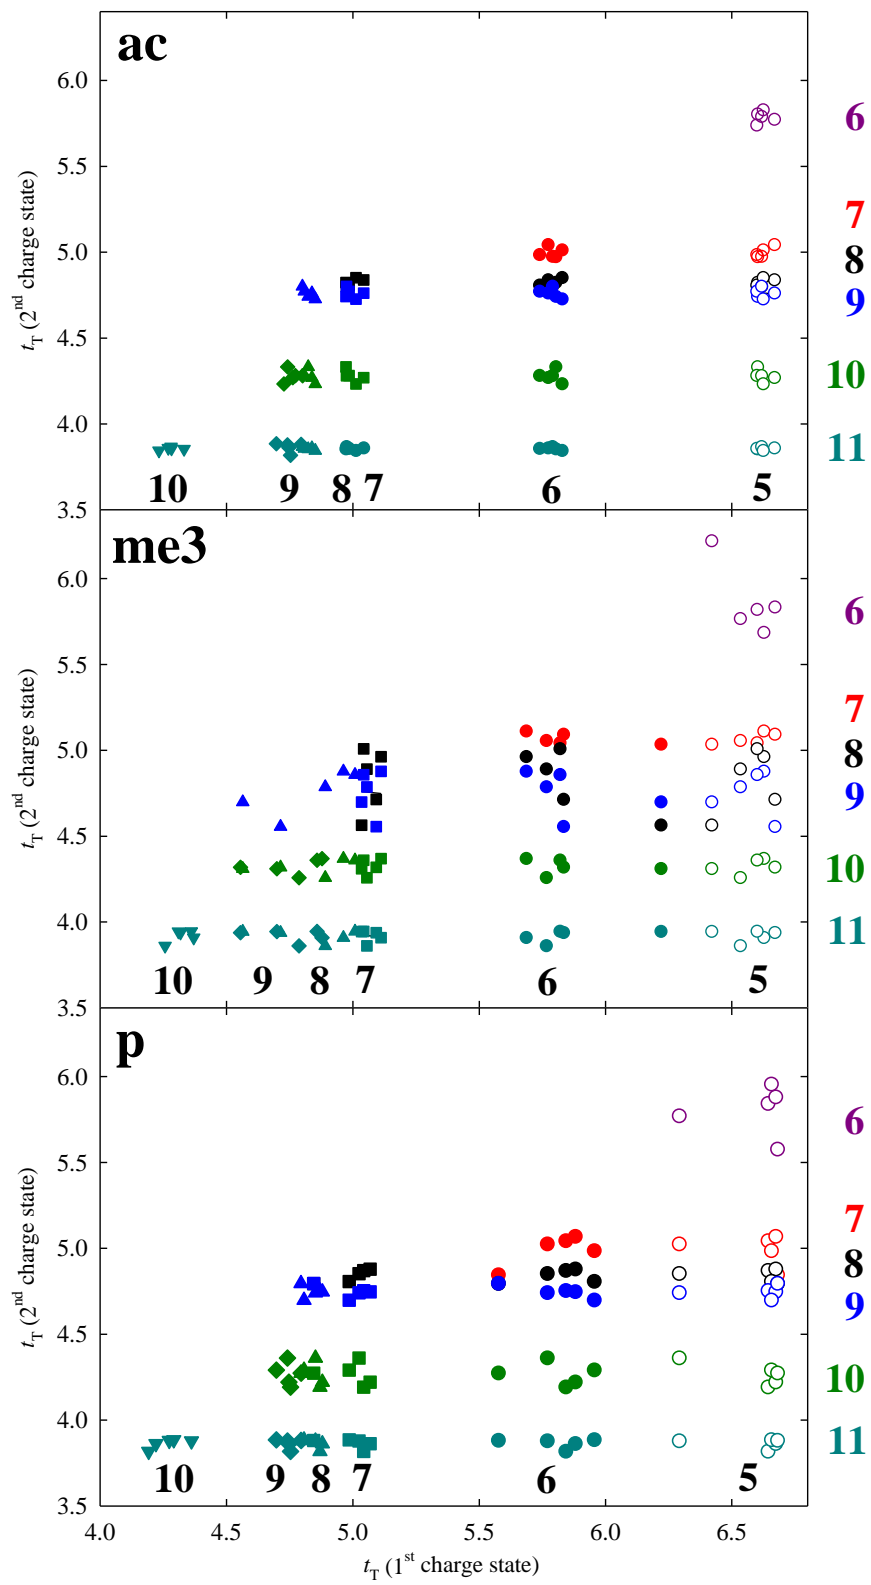

Figure S10

Acetylated

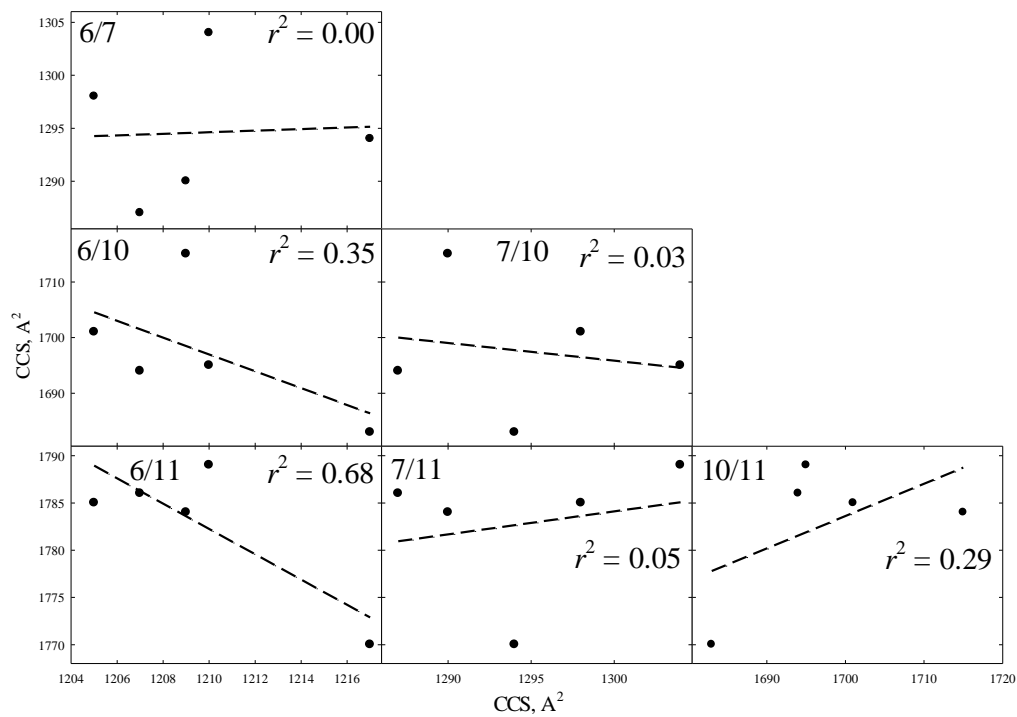

Phosphorylated

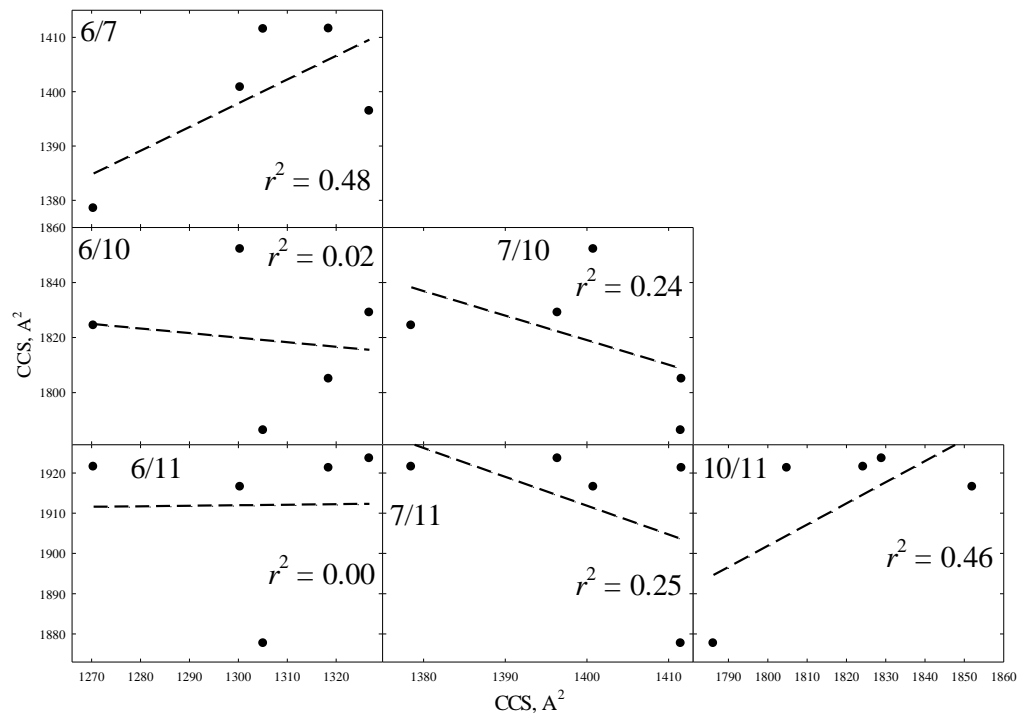

Figure S11

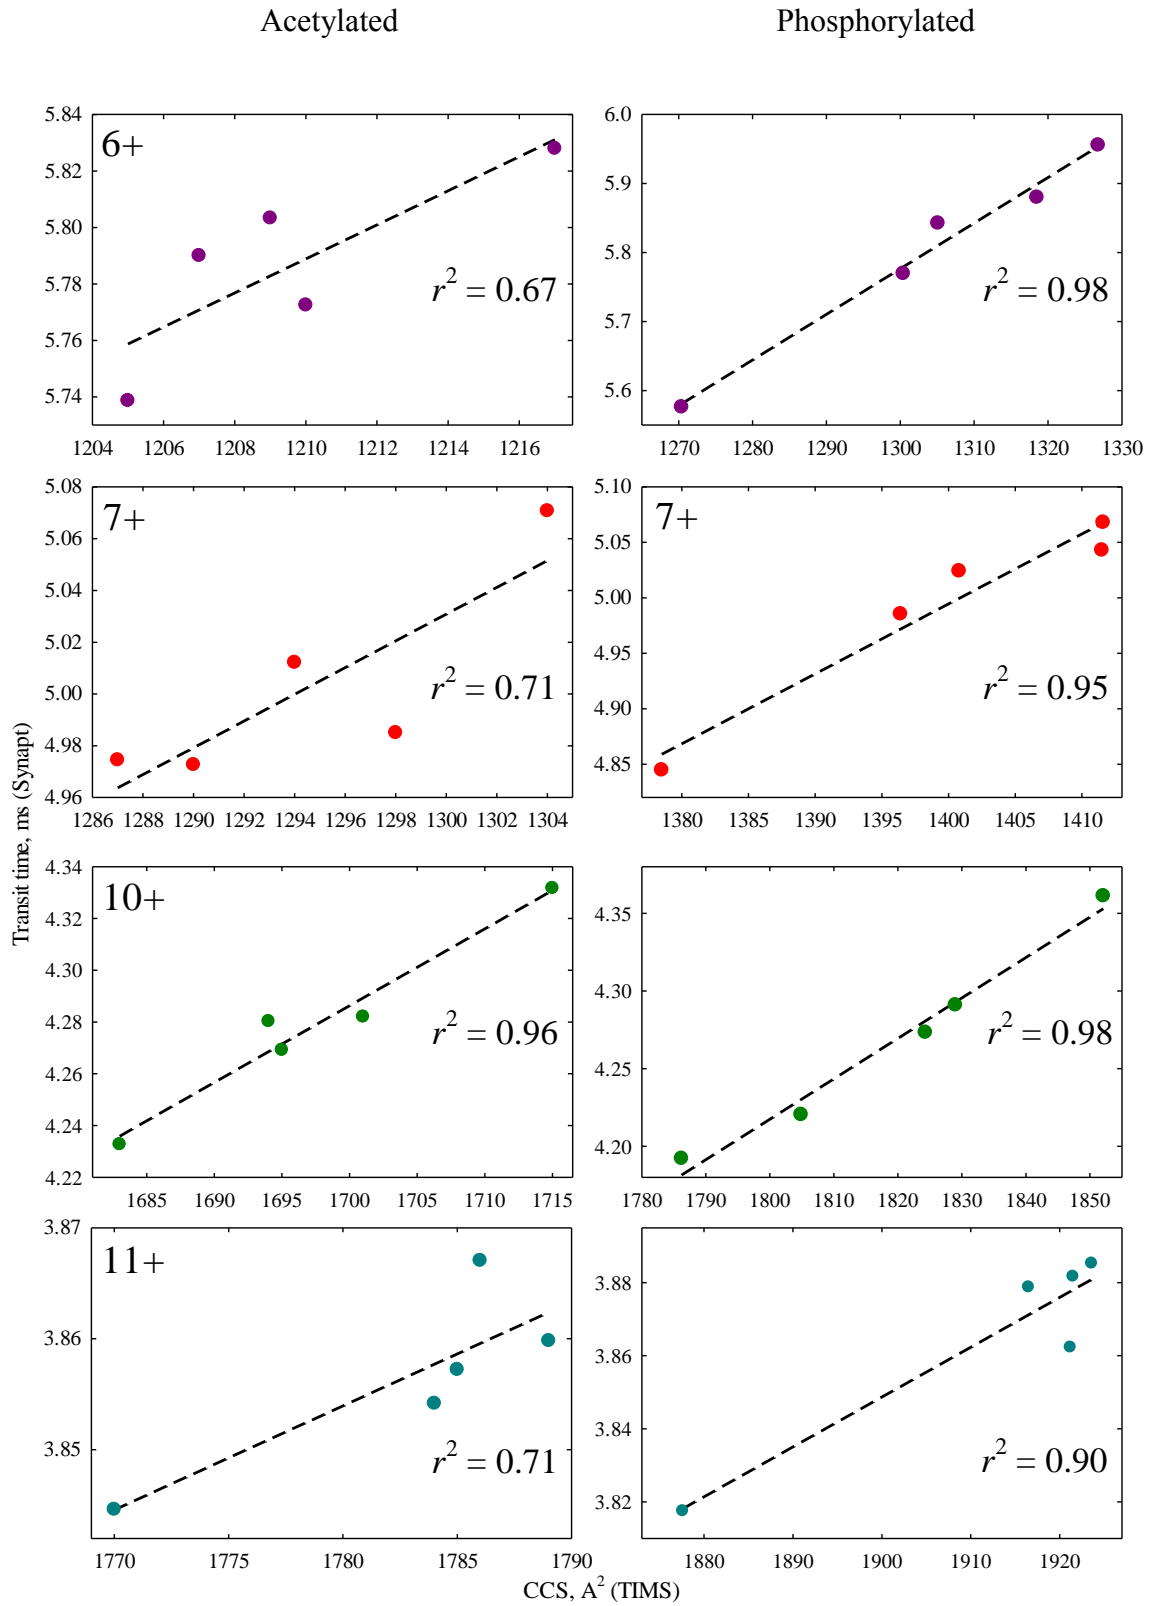

Figure S12a

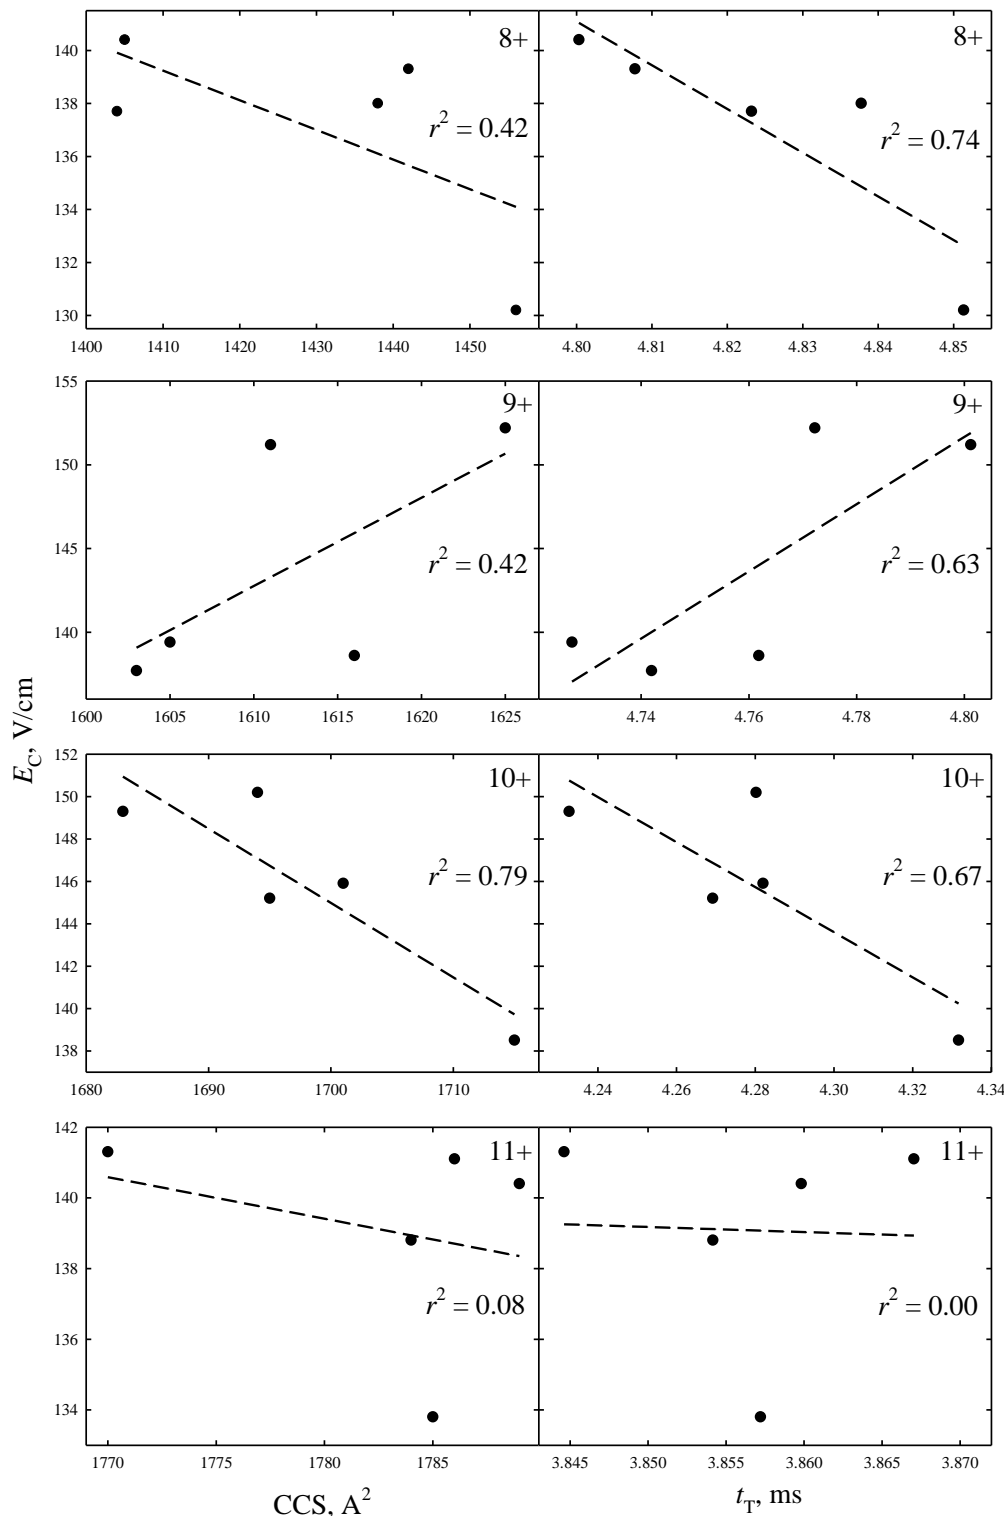

Figure S12b

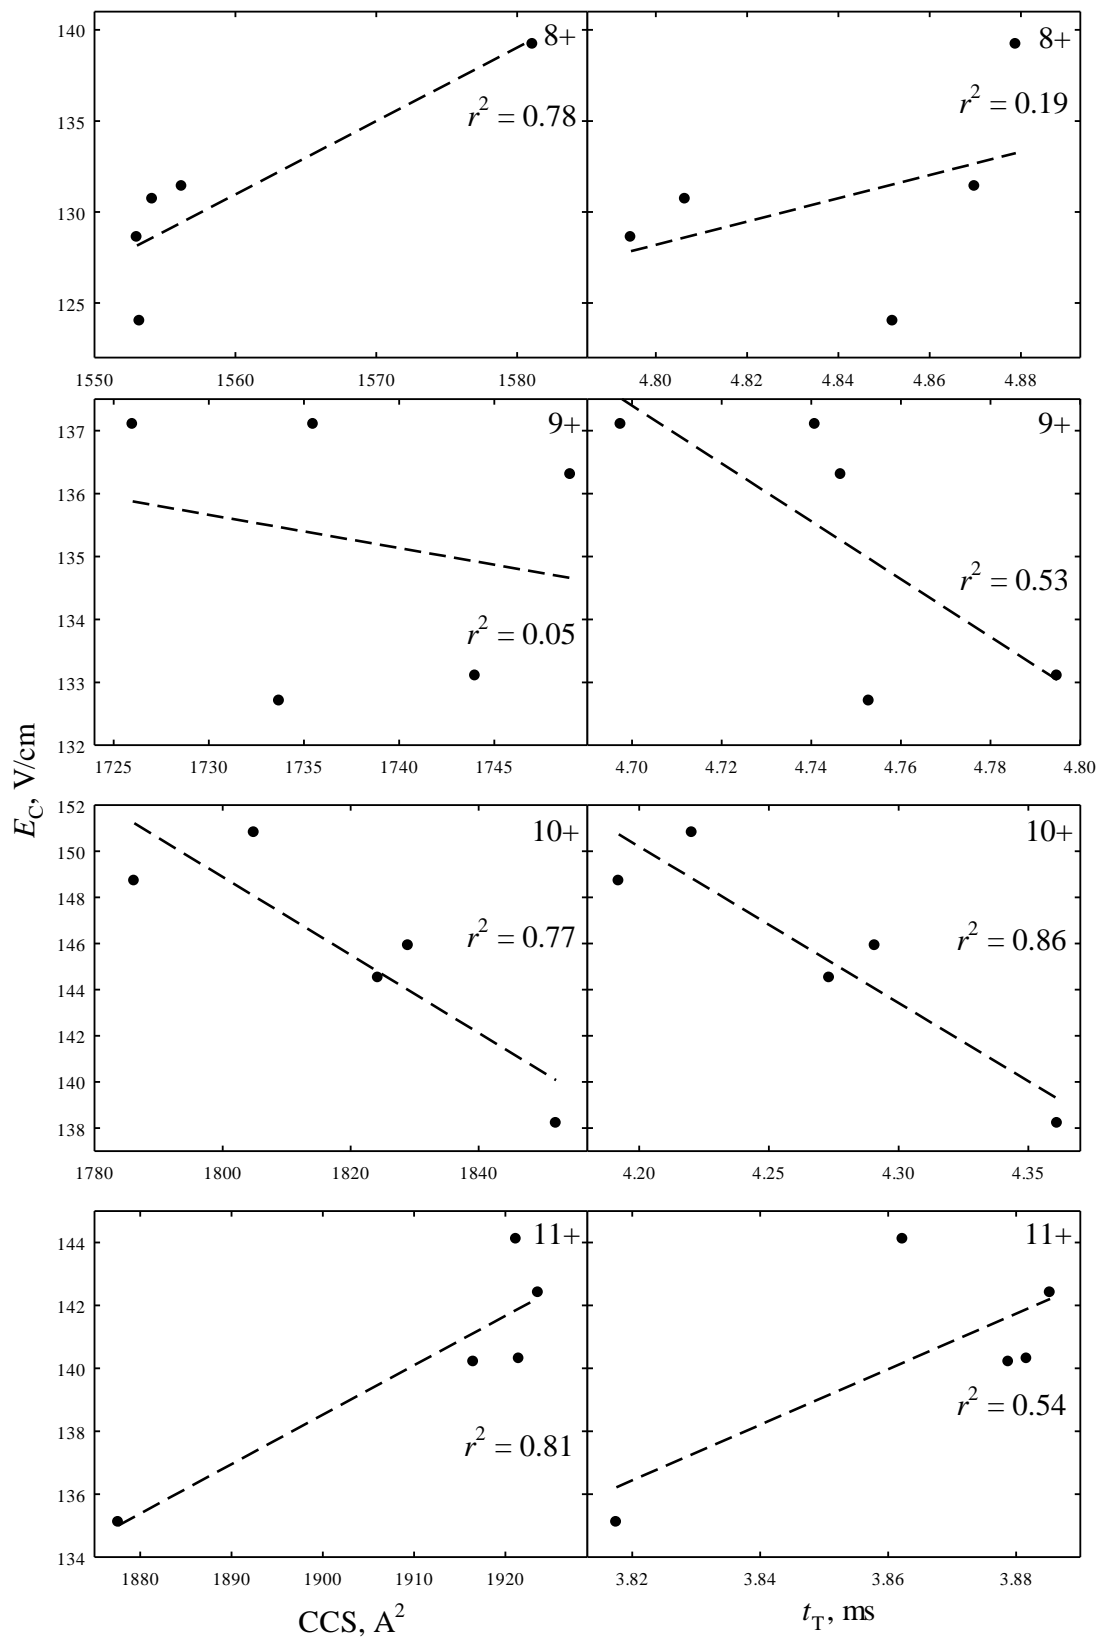

Figure S13a

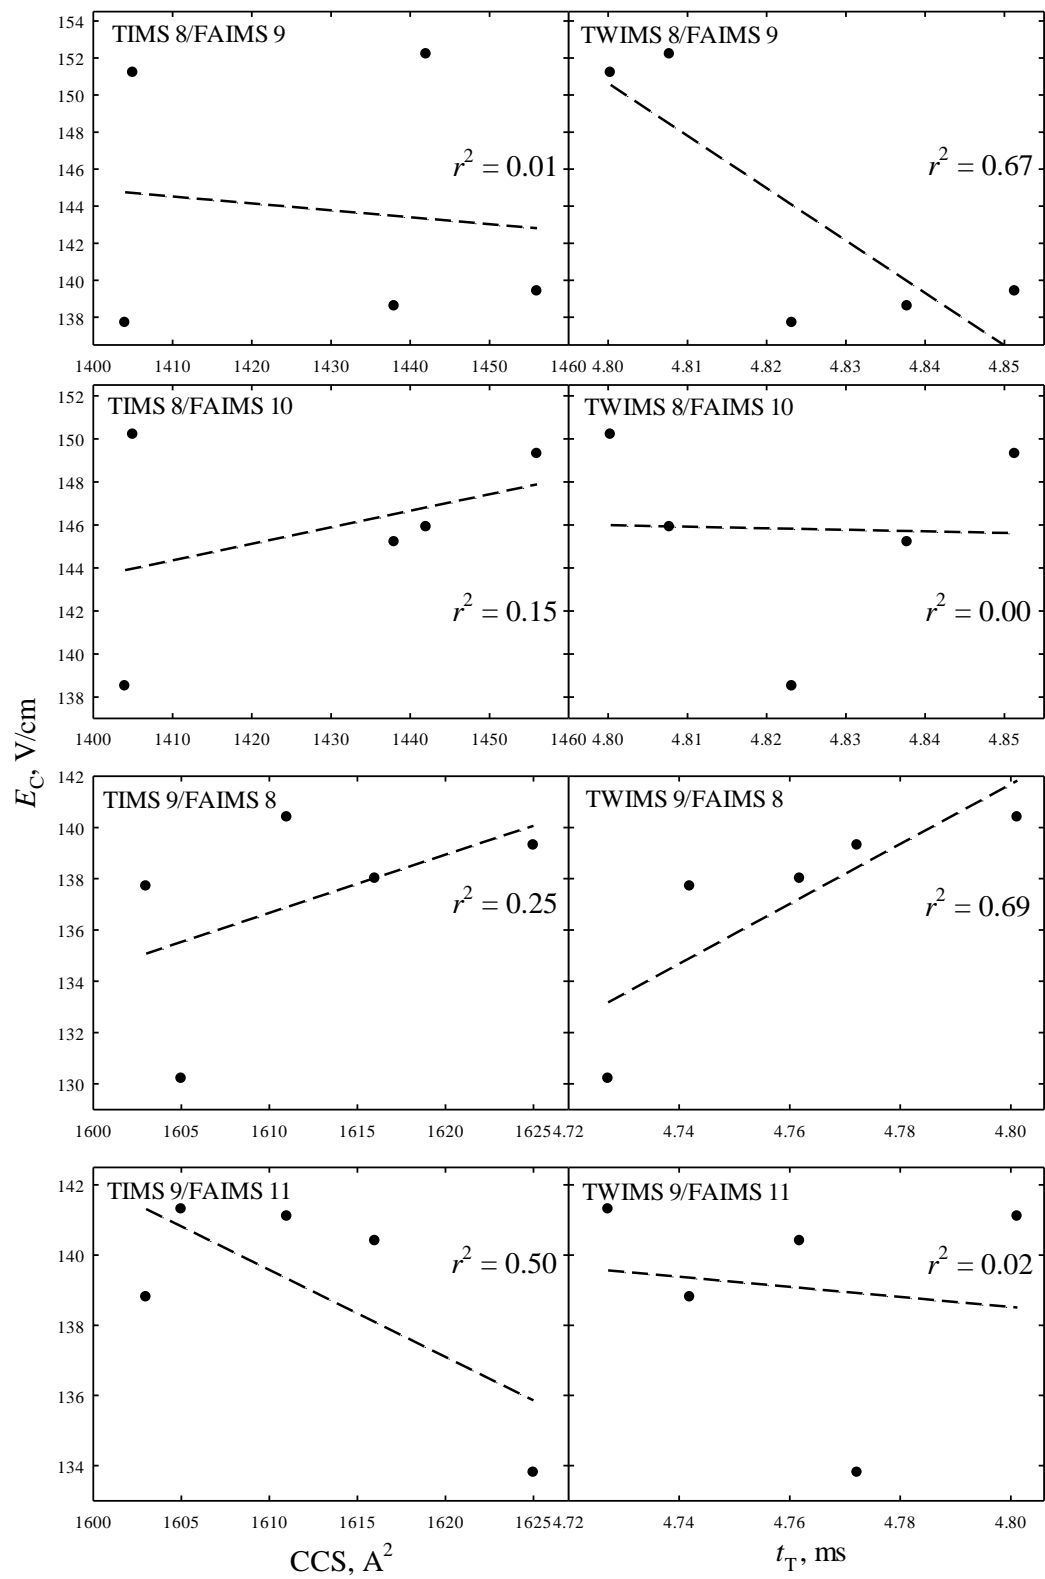



Figure S13a (continued)

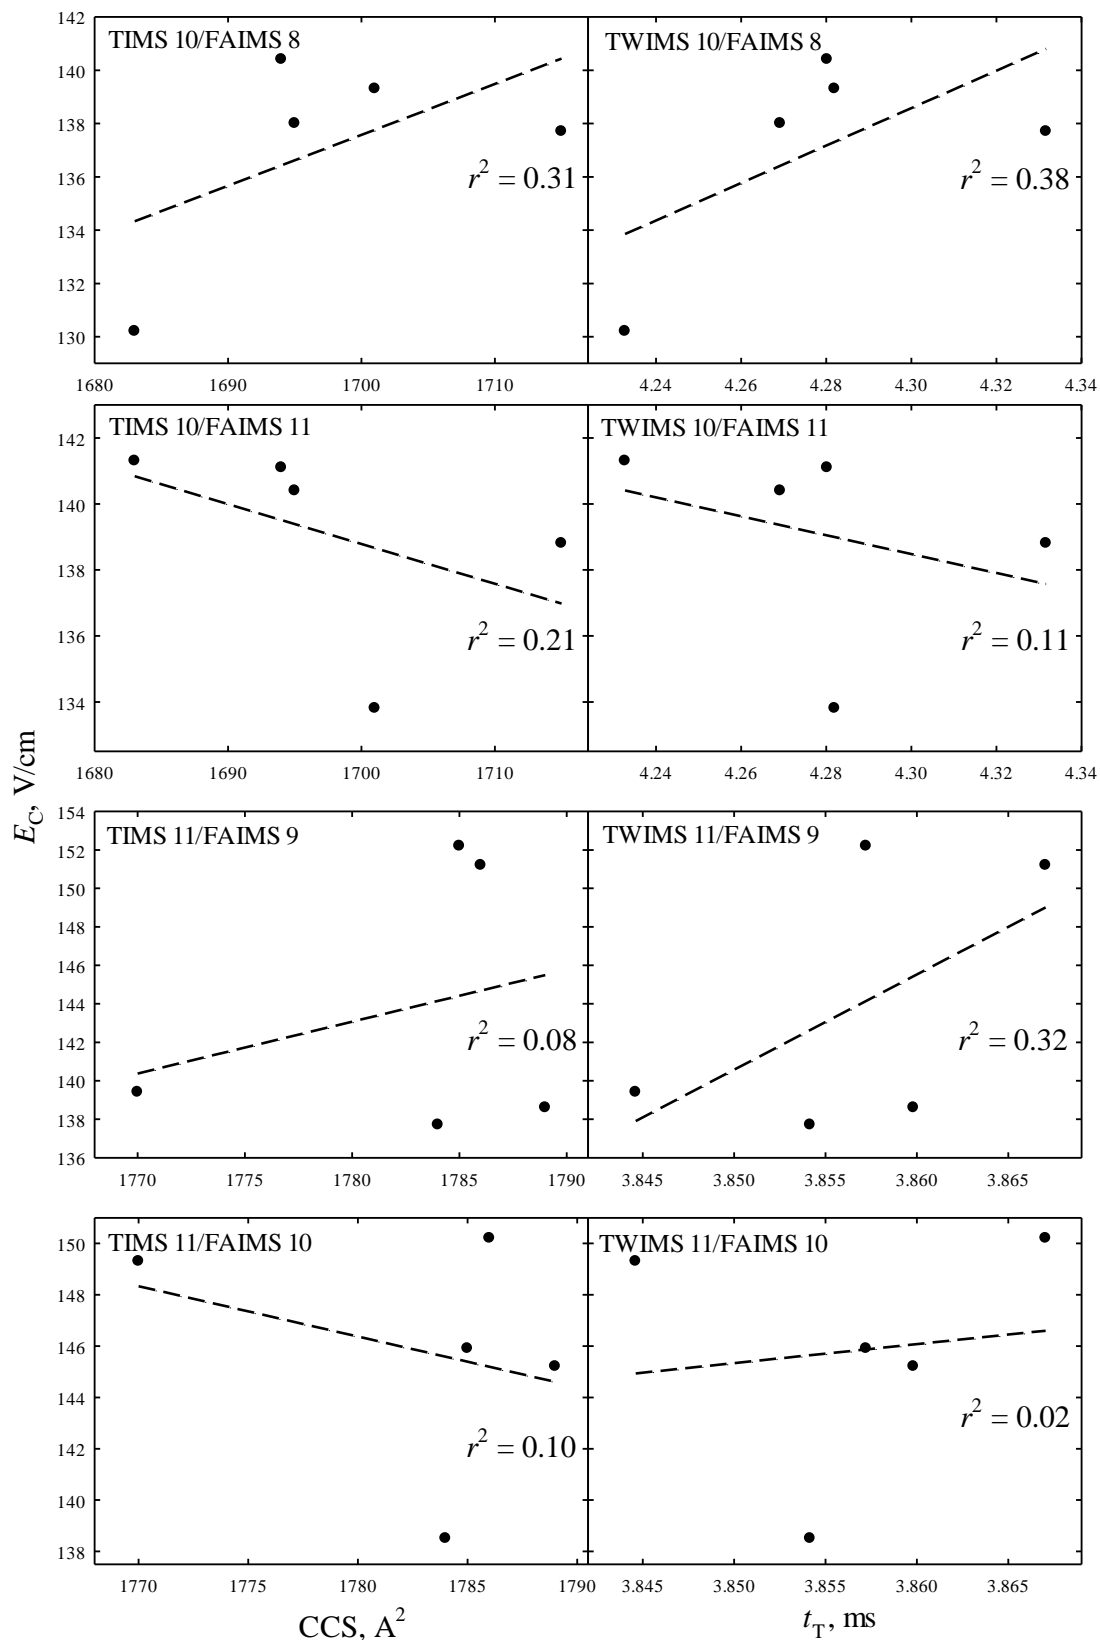

Figure S13b

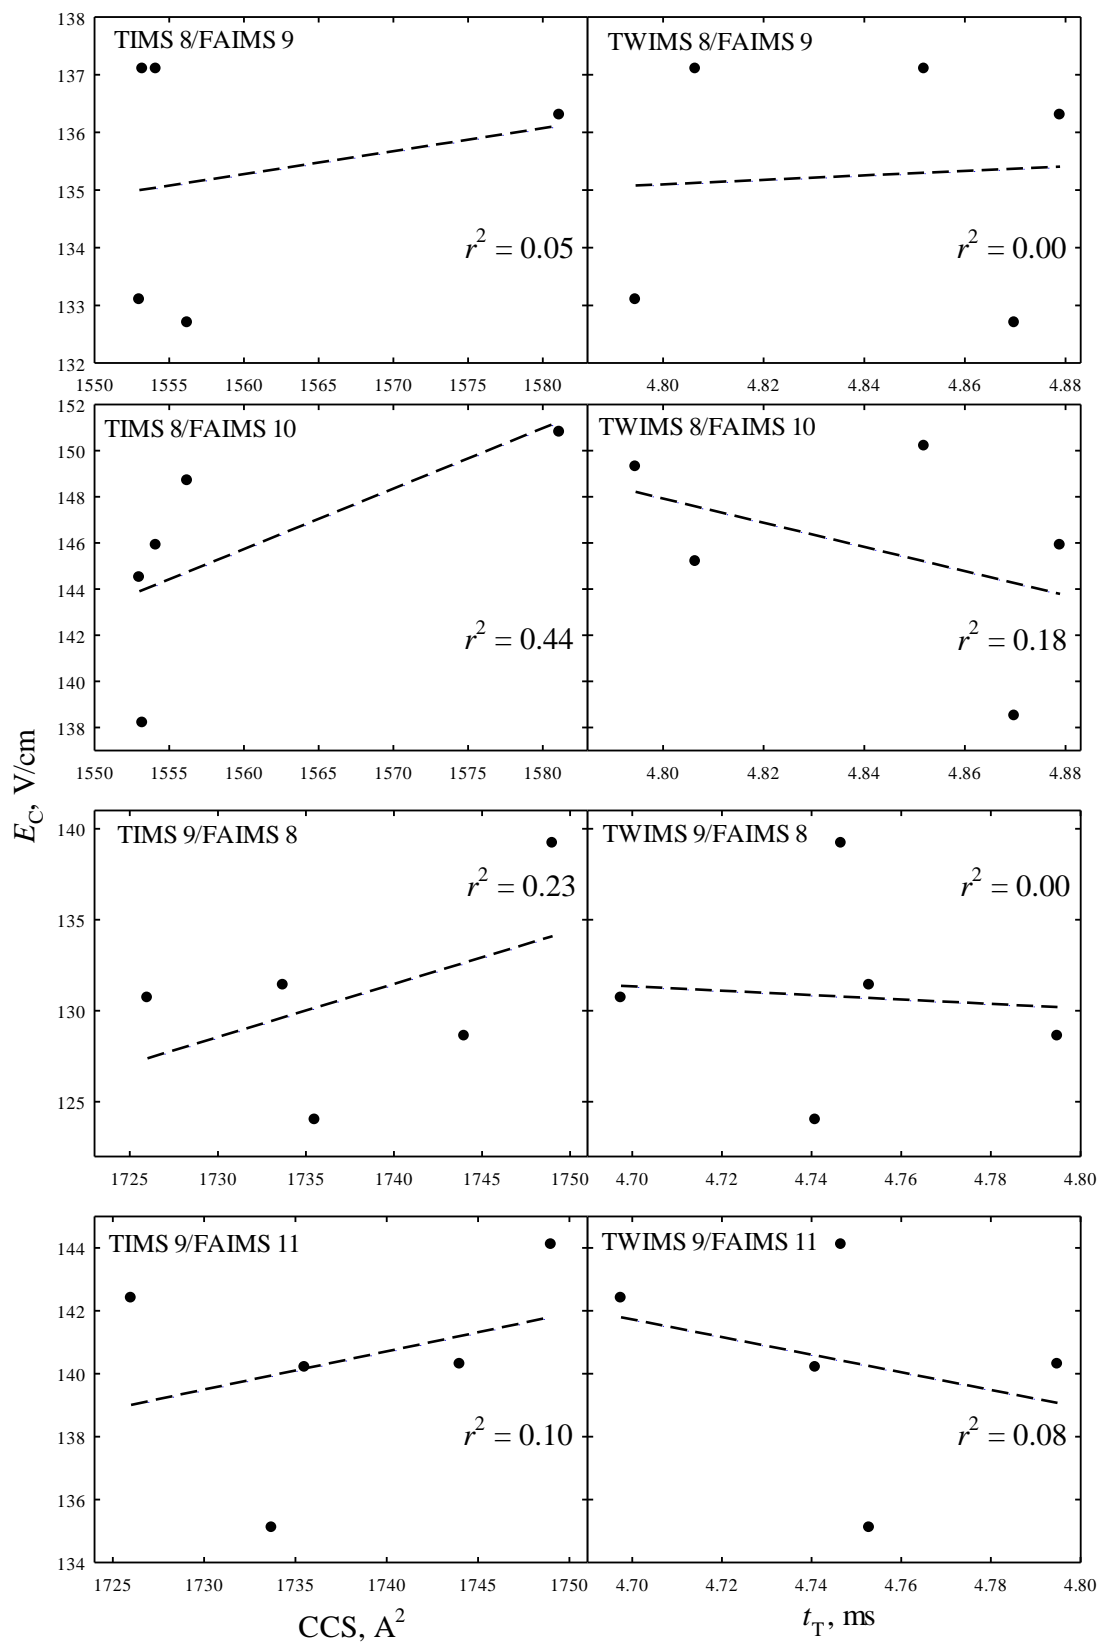

Figure S13b (continued)

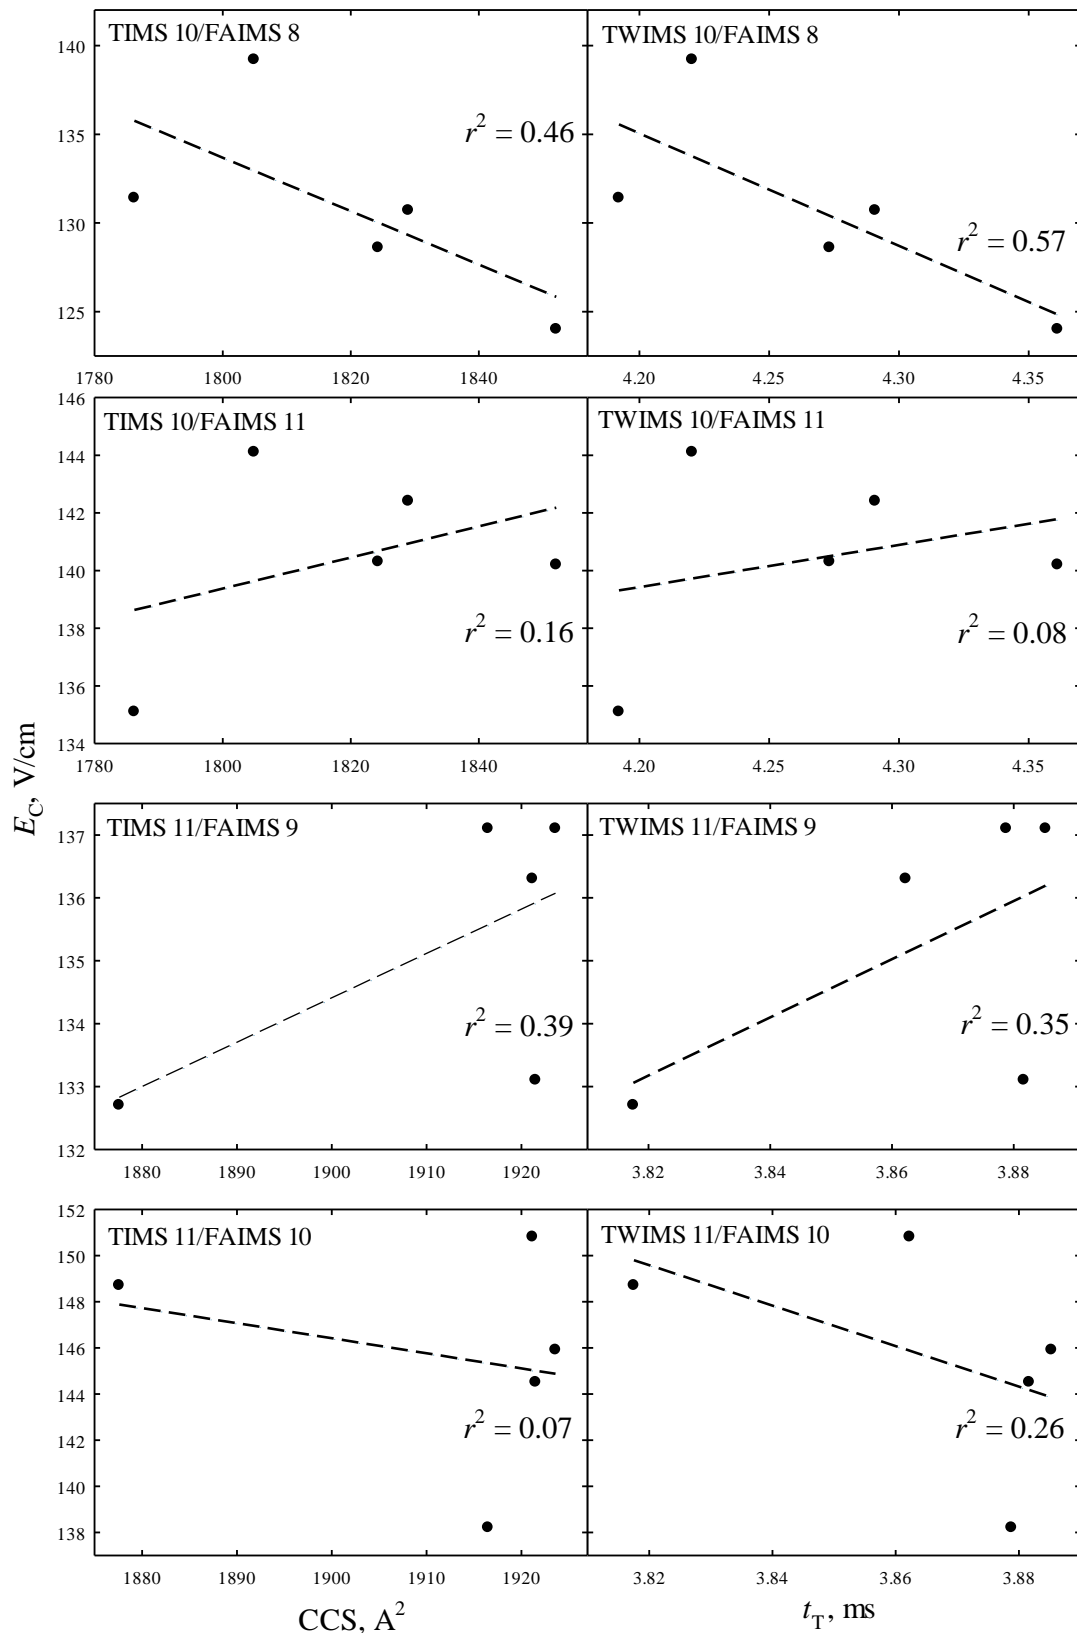

Supplement: NIHMS994692-supplement-Supplement.pdf [file NIHMS994692-supplement-Supplement.pdf]
